# Supplementary material for: The role of psychiatry in diagnosis and treatment of paediatric chronic fatigue syndrome – a scoping literature review
Source: publisher site journal article supplement (doi:10.1515/ijamh-2023-0030), 2023-06-01
Supplement: Supplementary file 2 [file j_ijamh-2023-0030_suppl_001.docx]

## SUPPLEMENTARY TABLES & FIGURES

**Supplementary table 1.** Search words

| fatigue syndrome, chronic/ | pediatric/ | psychiatry/ |
| --- | --- | --- |
| chronic fatigue disorder*.mp | pediatric.mp | psychiatrist*.mp |
| chronic fatigue fibromyalgia syndrome*.mp | paediatric.mp | psychiatry.mp |
| chronic fatigue syndrome*.mp | **adolescent/** | psychiatric.mp |
| chronic fatigue and immune dysfunction syndrome*.mp | adolescence.mp |  |
| chronic fatigue-fibromyalgia syndrome*.mp | adolescent*.mp |  |
| myalgic encephalomyelitis.mp | teen*.mp |  |
| systemic exertion intolerance disease.mp | teenager*.mp |  |
| postviral fatigue syndrome.mp | youth*.mp |  |
| Postexertional malaise.mp | **minor/** |  |
| Post-exertional malaise.mp | minor*.mp |  |
|  | **juvenile/** |  |
|  | juvenile* |  |
|  | **child/** |  |
|  | child* |  |
