# Supplementary material for: The role of psychiatry in diagnosis and treatment of paediatric chronic fatigue syndrome – a scoping literature review
Source: publisher site journal article supplement (doi:10.1515/ijamh-2023-0030), 2023-06-01
Supplement: Supplementary file 4 [file j_ijamh-2023-0030_suppl_002.docx]

**Supplementary table 2.** Detailed MEDLINE search strategy

| # | Searches | Results |
| --- | --- | --- |
| 1 | fatigue syndrome, chronic/ | 6357 |
| 2 | chronic fatigue disorder*.mp. | 8 |
| 3 | chronic fatigue fibromyalgia syndrome*.mp. | 1 |
| 4 | chronic fatigue syndrome*.mp. | 6456 |
| 5 | (chronic fatigue and immune dysfunction syndrome*).mp. [mp=title, book title, abstract, original title, name of substance word, subject heading word, floating sub-heading word, keyword heading word, organism supplementary concept word, protocol supplementary concept word, rare disease supplementary concept word, unique identifier, synonyms] | 30 |
| 6 | chronic fatigue-fibromyalgia syndrome*.mp. | 1 |
| 7 | myalgic encephalomyelitis.mp. | 1513 |
| 8 | systemic exertion intolerance disease.mp. | 45 |
| 9 | postviral fatigue syndrome.mp. | 60 |
| 10 | Postexertional malaise.mp. | 53 |
| 11 | Post-exertional malaise.mp. | 195 |
| 12 | **1 or 2 or 3 or 4 or 5 or 6 or 7 or 8 or 9 or 10 or 11** | **8308** |
| 13 | pediatric/ | 0 |
| 14 | pediatric.mp. | 373877 |
| 15 | paediatric.mp. | 73478 |
| 16 | adolescent/ | 2201626 |
| 17 | adolescence.mp. | 93295 |
| 18 | adolescent*.mp. | 2277332 |
| 19 | teen*.mp. | 35231 |
| 20 | teenager*.mp. | 16636 |
| 21 | youth*.mp. | 102406 |
| 22 | minor/ | 2789 |
| 23 | minor*.mp. | 363960 |
| 24 | juvenile/ | 0 |
| 25 | juvenile*.mp. | 104361 |
| 26 | child/ | 1888048 |
| 27 | child*.mp. | 2721261 |
| 28 | **13 or 14 or 15 or 16 or 17 or 18 or 19 or 20 or 21 or 22 or 23 or 24 or 25 or 26 or 27** | **4336781** |
| 29 | psychiatry/ | 43177 |
| 30 | psychiatrist*.mp. | 28350 |
| 31 | psychiatry.mp. | 104927 |
| 32 | psychiatric.mp. | 317468 |
| 33 | **29 or 30 or 31 or 32** | **393333** |
| 34 | 12 and 28 and 33 | 188 |
